# Supplementary material for: CONSORT Compliance of Phacoemulsification Randomised Controlled Trials: A Systematic Review
Source: Research Square preprint supplement (doi:10.21203/rs.3.rs-7190088/v1), 2025-09-03
Supplement: Supplementary file 1 [file 05efee50f2b7fc87f580a2f8.docx]

**Supplementary Digital Content 2 - References of the 25 included studies**

1. Shetty N, Nayak RP, Kaweri L, Kanaradi RK, Pisharody AA. 3D visualization system and standard operating microscope for ease of visualization and surgeon comfort during phacoemulsification surgery. Indian Journal of Ophthalmology. 2024 Jan 1;72(1):56-62.
2. Spaulding J, Hall B. The Cutting Efficiency of a Hybrid Phacoemulsification Tip Using High and Low Intraocular Pressure Settings in Different Grades of Cataract. Clinical Ophthalmology. 2024 Dec 31:3271-6.
3. Bigyabati R, Victor R, Rajkumari B. A STUDY TO COMPARE THE AMOUNT OF ASTIGMATISM FOLLOWING MANUAL SMALL INCISION CATARACT SURGERY AND PHACOEMULSIFICATION. Int J Acad Med Pharm. 2023;5(5):1679-82.
4. Ashraf M, Nazullah SK, Rafique M. To Evaluate the Difference in Astigmatism on Keratometry Resulting from Temporal and Superior Corneal Incisions During Phacoemulsification. InMedical Forum Monthly 2024 Mar 30 (Vol. 35, No. 3).
5. Ganesh S, Brar S, Wadhokar S. Changes in endothelial cell density following conventional phacoemulsification and femtosecond laser-assisted cataract surgery in eyes with dense cataracts. Journal of Cataract & Refractive Surgery. 2024 May 13:10-97.
6. SHINDE I, JOSHI A, PANDHARIKAR A. Comparison of Surgically-induced Astigmatism using Topography and Keratometry in Patients undergoing Phacoemulsification and Small Incision Cataract Surgery: A Prospective Interventional Study. Journal of Clinical & Diagnostic Research. 2024 Jul 1;18(7).

| 1. Rana V, Sinha DK, Dangi M, Gupta A, Bandopadhyay S, Kaushik J, Kumar A, Tripathi AN. Efficacy and safety of the OZil phacoemulsification handpiece in dropped lens fragment surgery: a randomized controlled trial. Romanian Journal of Ophthalmology. 2024 Jul;68(3):287. |
| --- |

1. Tao J, Wan Y, Song X. Comparison of the reverse chopper-assisted prechop and phaco-chop nucleotomy techniques during phacoemulsification for cataracts with grade III nuclei: A randomized controlled trial. Annals of Translational Medicine. 2023 Jan 31;11(2):105.
2. Akmaz B, Kilic D, Duru N. The safety and efficacy of phacoemulsification surgery in uncomplicated cataracts with and without an ophthalmic-viscosurgical-device. European Journal of Ophthalmology. 2023 Jan;33(1):269-77.
3. Liu Z, Lin H, Jin L, Qu B, Liu J, Zheng Y, He M, Luo L, Liu Y. Swab pressing vs stromal hydration to prevent incision leakage and transient collapse of anterior chamber in phacoemulsification: a randomized clinical trial. JAMA ophthalmology. 2023 Jun 1;141(6):574-81.
4. Zarei R, Azimi A, Fakhraei G, Eslami Y, Naderan M, Nouri-Mahdavi K, Caprioli J. Combined phacoviscocanalostomy versus phacoemulsification alone in patients with coexisting cataract and mild-to-moderate open-angle glaucoma; a randomized-controlled trial. Eye. 2023 May;37(7):1390-6.
5. Wang S, Tao J, Yu X, Diao W, Bai H, Yao L. Safety and prognosis of phacoemulsification using active sentry and active fluidics with different IOP settings-a randomized, controlled study. BMC ophthalmology. 2024 Aug 16;24(1):350.
6. Rauen MP, Joiner H, Kohler RA, O'Connor S. Phacoemulsification using an active fluidics system at physiologic vs high intraocular pressure: impact on anterior and posterior segment physiology. Journal of Cataract & Refractive Surgery. 2024 Aug 1;50(8):822-7.
7. Potti S, Sodum NR. Comparison of pupil expansion devices in small pupil phacoemulsification. Indian Journal of Ophthalmology. 2024 Jul 1;72(Suppl 4):S664-8.
8. Guan GQ, Lin XD, Bao JL, Zhou XZ. Effect of cervical pillow in phacoemulsification surgery for age-related cataract patients: a prospective randomized controlled study. International Ophthalmology. 2024 Jun 11;44(1):232.
9. El Sayed YM, Mettias NM, Elghonemy HM, Mostafa YS. Phacoemulsification with gonioscopy‐assisted transluminal trabeculotomy versus phacoemulsification alone in primary angle closure glaucoma: A randomized controlled study. Acta Ophthalmologica. 2024 Mar;102(2):e195-203.
10. Zhou KJ, Huang Y, Wang Y, Pan AP, Shao X, Tu RX, Yu AY. Safety and efficacy of cataract surgery performed with a low-energy femtosecond laser compared with conventional phacoemulsification in Chinese patients: a randomized clinical trial. Eye and Vision. 2023 Jul 2;10(1):31.
11. Asanathong D. Comparative Evaluation of Phacoemulsification with Goniosynechialysis and Phacoemulsification with Viscogonioplasty in Angle-Closure: A Randomized Clinical Trial. Siriraj Medical Journal. 2024 Dec 1;76(12):810-21.
12. Spaulding, Justin & Hall, Brad. Efficiency of phacoemulsification handpieces with high and low intraocular pressure settings. Journal of Cataract & Refractive Surgery. 2024 Nov 1;51(3):218–21
13. Singh N, Kumar R, Singh K. Comparison between direct chop and stop and chop phacoemulsification techniques in grade 3 and 4 cataract patients. International Journal of Life Sciences Biotechnology and Pharma Research. 2024 Jun 1;13(6):7–19.
14. Vasavada V, Agrawal D, Vasavada SA, Vasavada AR, Yagnik J. Intraoperative Performance and Early Postoperative Outcomes Following Phacoemulsification With Three Fluidic Systems: A Randomized Trial. Journal of Refractive Surgery. 2024 May 1;40(5):e304-12.
15. Wood K, Pessach Y, Kovalyuk N, Lifshitz M, Winter H, Pikkel J. Corneal endothelial cell loss and intraocular pressure following phacoemulsification using a new viscous-cohesive ophthalmic viscosurgical device. International Ophthalmology. 2024 Feb 6;44(1):10.
16. Maheshwari D, Grover DS, Ramakrishnan R, Pillai MR, Chautani D, Kader MA. Early outcomes of combined phacoemulsification and ab interno Tanito Microhook trabeculotomy in open-angle glaucoma. Ophthalmology Glaucoma. 2024 Mar 1;7(2):123-30.
17. Vasavada AR, Vasavada SA, Nath V, Vasavada V, Patel P. FLACS vs conventional phacoemulsification by junior cataract surgeons: randomized trial. Journal of Cataract & Refractive Surgery. 2023 Feb 1;49(2):159-64.
18. Cruz JC, Moreno CB, Soares PV, Moscovici BK, Colombo-Barboza GN, Colombo-Barboza LR, Colombo-Barboza MN. Comparison of endothelial cell loss in diabetic patients after conventional phacoemulsification and femtosecond laser-assisted cataract surgery. BMC ophthalmology. 2023 Apr 26;23(1):181.
