# Supplementary material for: CONSORT Compliance of Phacoemulsification Randomised Controlled Trials: A Systematic Review
Source: Research Square preprint supplement (doi:10.21203/rs.3.rs-7190088/v1), 2025-09-03
Supplement: Supplementary file 2 [file 351b8bf71a41c3eb32962843.xlsx]

## Sheet: Supplementary Digital Content 5
Title	Bias Arising from the Randomization Process	Bias Due to Deviations from Intended Interventions	Bias Due to Missing Outcome Data	Bias in the Measurement of the Outcome	Bias in Measurement of the Reported Result	Overall RoB
3D visualization system and standard operating microscope for ease of visualization and surgeon comfort during phacoemulsification surgery	No concerns	Some concerns	No concerns	Some concerns	No concerns	Moderate
The Cutting Efficiency of a Hybrid Phacoemulsification Tip Using High and Low Intraocular Pressure Settings in Different Grades of Cataract	No concerns	No concerns	No concerns	Some concerns	Some concerns	Moderate
A study to compare the amount of astigmatism following manual small incision cataract surgery and phacoemulsification	No concerns	No concerns	No concerns	Some concerns	Some concerns	Moderate
To Evaluate the Difference in Astigmatism on Keratometry Resulting from Temporal and Superior Corneal Incisions During Phacoemulsification	No concerns	No concerns	No concerns	Some concerns	Some concerns	Moderate
Changes in endothelial cell density following conventional phacoemulsification and femtosecond laser-assisted cataract surgery in eyes with dense cataracts	No concerns	No concerns	No concerns	Some concerns	Some concerns	Moderate
Comparison of Surgically-induced Astigmatism using Topography and Keratometry in Patients undergoing Phacoemulsification and Small Incision Cataract Surgery: a Prospective Interventional Study	No concerns	No concerns	No concerns	Some concerns	Some concerns	Moderate
Efficacy and safety of the OZil phacoemulsification handpiece in dropped lens fragment surgery: a randomized controlled trial	No concerns	No concerns	No concerns	Some concerns	Some concerns	Moderate
Comparison of the reverse chopper-assisted prechop and phaco-chop nucleotomy techniques during phacoemulsification for cataracts with grade III nuclei: a randomized controlled trial	No Concerns	Some Concerns	No Concerns	No Concerns	Some Concerns	Moderate
The safety and efficacy of phacoemulsification surgery in uncomplicated cataracts with and without an ophthalmic-viscosurgical-device	Some Concerns	Some Concerns	Some Concerns	Some Concerns	Some Concerns	Moderate
Swab Pressing vs Stromal Hydration to Prevent Incision Leakage and Transient Collapse of Anterior Chamber in Phacoemulsification: A Randomized Clinical Trial.	No Concerns	Some Concerns	No Concerns	No Concerns	No Concerns	Low
Combined phacoviscocanalostomy versus phacoemulsification alone in patients with coexisting cataract and mild-to-moderate open-angle glaucoma; a randomized-controlled trial.	No Concerns	Some Concerns	No Concerns	Some Concerns	Some Concerns	Moderate
Safety and prognosis of phacoemulsification using active sentry and active fluidics with different IOP settings - a randomized, controlled study.	No Concerns	No Concerns	No Concerns	No Concerns	No Concerns	Low
Phacoemulsification using an active fluidics system at physiologic vs high intraocular pressure: impact on anterior and posterior segment physiology.	No Concerns	No Concerns	No Concerns	No Concerns	No Concerns	Low
Comparison of pupil expansion devices in small pupil phacoemulsification.	Some Concerns	No Concerns	No Concerns	Some Concerns	Some Concerns	Moderate
Effect of cervical pillow in phacoemulsification surgery for age-related cataract patients: a prospective randomized controlled study.	No Concerns	No Concerns	Some Concerns	No Concerns	No Concerns	Low
Phacoemulsification with gonioscopy-assisted transluminal trabeculotomy versus phacoemulsification alone in primary angle closure glaucoma: A randomized controlled study.	Some Concerns	Some Concerns	Some Concerns	No Concerns	No Concerns	Moderate
Safety and efficacy of cataract surgery performed with a low-energy femtosecond laser compared with conventional phacoemulsification in Chinese patients: a randomized clinical trial.	No Concerns	No Concerns	No Concerns	No Concerns	No Concerns	Low
Comparative Evaluation of Phacoemulsification with Goniosynechialysis and Phacoemulsification with Viscogonioplasty in Angle-Closure: A Randomized Clinical Trial	No Concerns	No Concerns	Some Concerns	No Concerns	Some Concerns	Moderate
Efficiency of phacoemulsification handpieces with high and low intraocular pressure settings	No Concerns	No Concerns	No Concerns	No Concerns	Some Concerns	Low
Comparison between direct chop and stop and chop phacoemulsification techniques in grade 3 and 4 cataract patients	Some Concerns	Some Concerns	No Concerns	No Concerns	Some Concerns	Moderate
Intraoperative Performance and Early Postoperative Outcomes Following Phacoemulsification With Three Fluidic Systems: A Randomized Trial	No Concerns	Some Concerns	No Concerns	No Concerns	Some Concerns	Moderate
Corneal endothelial cell loss and intraocular pressure following phacoemulsification using a new viscous-cohesive ophthalmic viscosurgical device	No Concerns	Some Concerns	Some Concerns	No Concerns	Some Concerns	Moderate
Early Outcomes of Combined Phacoemulsification and Ab Interno Tanito Microhook Trabeculotomy in Open-Angle Glaucoma	No Concerns	Some Concerns	No concerns	Some Concerns	No concerns	Moderate
FLACS vs conventional phacoemulsification by junior cataract surgeons: randomized trial	No Concerns	Some Concerns	No Concerns	No Concerns	Some Concerns	Moderate
Comparison of endothelial cell loss in diabetic patients after conventional phacoemulsification and femtosecond laser-assisted cataract surgery	No Concerns	Some Concerns	No Concerns	No Concerns	Some Concerns	Moderate
