# Supplementary material for: CONSORT Compliance of Phacoemulsification Randomised Controlled Trials: A Systematic Review
Source: Research Square preprint supplement (doi:10.21203/rs.3.rs-7190088/v1), 2025-09-03
Supplement: Supplementary file 3 [file 85fc0b69b9cd7ef0db4d1564.docx]

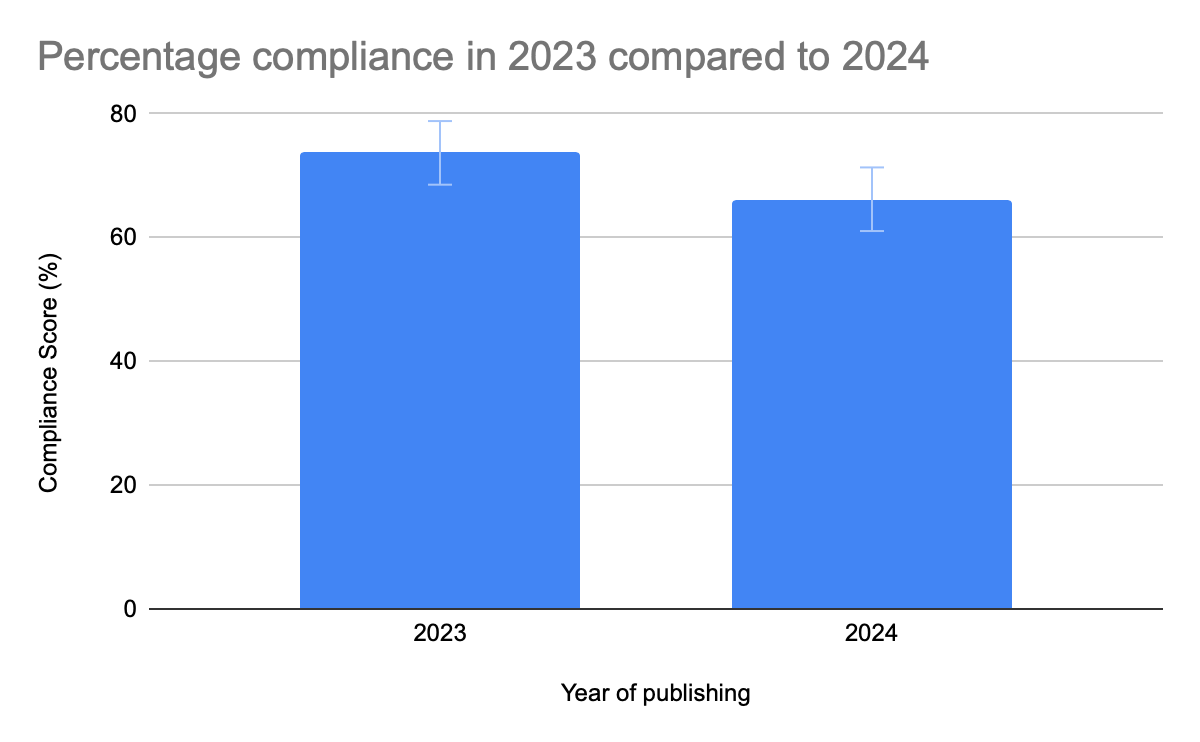
 Supplementary Digital Content 4: Percentage CONSORT-NPT compliance between papers published in 2023 and 2024.
