# Supplementary material for: CONSORT Compliance of Phacoemulsification Randomised Controlled Trials: A Systematic Review
Source: Research Square preprint supplement (doi:10.21203/rs.3.rs-7190088/v1), 2025-09-03
Supplement: Supplementary file 4 [file 8995228ef9d433660d1e5721.xlsx]

## Sheet: Supplementary Digital Content 3
Study Title	Publication year	Number of authors	Region	Impact Factor	Number of eyes	Single/MultiCentre
3D visualization system and standard operating microscope for ease of visualization and surgeon comfort during phacoemulsification surgery	2024	6	South Asia	2.1	224	Single
The Cutting Efficiency of a Hybrid Phacoemulsification Tip Using High and Low Intraocular Pressure Settings in Different Grades of Cataract	2024	2	North America	1.8	102	Single
A Study to Compare the Amount of Astigmatism Following Manual Small Incision Cataract Surgery and Phacoemulsification	2023	3	South Asia	1	140	Single
To Evaluate the Difference in Astigmatism on Keratometry Resulting from Temporal and Superior Corneal Incisions During Phacoemulsification	2024	5	South Asia	0.1	140	Single
Changes in endothelial cell density following conventional phacoemulsification and femtosecond laser-assisted cataract surgery in eyes with dense cataracts	2024	3	South Asia	2.6	100	Single
Comparison of Surgically-induced Astigmatism using Topography and Keratometry in Patients undergoing Phacoemulsification and Small Incision Cataract Surgery: a Prospective Interventional Study	2024	3	South Asia	0.409	100	Single
Efficacy and safety of the OZil phacoemulsification handpiece in dropped lens fragment surgery: a randomized controlled trial	2024	8	South Asia	0.5	40	Single
Comparison of the reverse chopper-assisted prechop and phaco-chop nucleotomy techniques during phacoemulsification for cataracts with grade III nuclei: a randomized controlled trial	2023	3	East Asia	3.616	89	Single
The safety and efficacy of phacoemulsification surgery in uncomplicated cataracts with and without an ophthalmic-viscosurgical-device	2023	3	Middle East	1.5	60	Single
Swab Pressing vs Stromal Hydration to Prevent Incision Leakage and Transient Collapse of Anterior Chamber in Phacoemulsification: A Randomized Clinical Trial.	2023	9	East Asia	6.7	126	Single
Combined phacoviscocanalostomy versus phacoemulsification alone in patients with coexisting cataract and mild-to-moderate open-angle glaucoma; a randomized-controlled trial.	2023	7	Middle East	4.456	89	Single
Safety and prognosis of phacoemulsification using active sentry and active fluidics with different IOP settings - a randomized, controlled study.	2024	6	East Asia	2.01	110	Single
Phacoemulsification using an active fluidics system at physiologic vs high intraocular pressure: impact on anterior and posterior segment physiology.	2024	4	United States	2.6	54	Single
Comparison of pupil expansion devices in small pupil phacoemulsification.	2024	2	South Asia	1.02	36	Single
Effect of cervical pillow in phacoemulsification surgery for age-related cataract patients: a prospective randomized controlled study.	2024	4	East Asia	1.4	104	Single
Phacoemulsification with gonioscopy-assisted transluminal trabeculotomy versus phacoemulsification alone in primary angle closure glaucoma: A randomized controlled study.	2024	4	Middle East	3.4	74	Single
Safety and efficacy of cataract surgery performed with a low-energy femtosecond laser compared with conventional phacoemulsification in Chinese patients: a randomized clinical trial.	2023	7	East Asia	4.4	132	Multi
Comparative Evaluation of Phacoemulsification with Goniosynechialysis and Phacoemulsification with Viscogonioplasty in Angle-Closure: A Randomized Clinical Trial	2024	1	East Asia	0.9	58	Single
Efficiency of phacoemulsification handpieces with high and low intraocular pressure settings	2024	2	North America	1.5	36	Single
Comparison between direct chop and stop and chop phacoemulsification techniques in grade 3 and 4 cataract patients	2024	3	South Asia	6.1	100	Single
Intraoperative Performance and Early Postoperative Outcomes Following Phacoemulsification With Three Fluidic Systems: A Randomized Trial	2024	4	South Asia	2.4	100	Single
Corneal endothelial cell loss and intraocular pressure following phacoemulsification using a new viscous-cohesive ophthalmic viscosurgical device	2024	6	Middle East	1.4	42	Single
Early Outcomes of Combined Phacoemulsification and Ab Interno Tanito Microhook Trabeculotomy in Open-Angle Glaucoma	2024	6	South Asia	2.9	114	Single
FLACS vs conventional phacoemulsification by junior cataract surgeons: randomized trial	2023	5	South Asia	2.8	320	Single
Comparison of endothelial cell loss in diabetic patients after conventional phacoemulsification and femtosecond laser-assisted cataract surgery	2023	7	South America	1.7	95	Single
