# Supplementary material for: CONSORT Compliance of Phacoemulsification Randomised Controlled Trials: A Systematic Review
Source: Research Square preprint supplement (doi:10.21203/rs.3.rs-7190088/v1), 2025-09-03
Supplement: Supplementary file 5 [file 93ff13a5231ea81bf69c25e5.xlsx]

## Sheet: Supplementary Digital Content 7
AMSTAR-2 Criterion	Our Review	Yao et al. 2014: Yao AC, Khajuria A, Camm CF, Edison E, Agha R. The reporting quality of parallel randomised controlled trials in ophthalmic surgery in 2011: a systematic review. Eye (Lond). 2014 Nov;28(11):1341-9. doi: 10.1038/eye.2014.206. Epub 2014 Sep 12. PMID: 25214001; PMCID: PMC4274293.
1. Did the research questions and inclusion criteria for the review include the components of PICO?	Yes	Yes
2. Did the report of the review contain an explicit statement that the review methods were established prior to the conduct of the review and did the report justify any significant deviations from the protocol?	Yes	No
3. Did the review authors explain their selection of the study designs for inclusion in the review?	Yes	Yes
4. Did the review authors use a comprehensive literature search strategy?	Yes	No
5. Did the review authors perform study selection in duplicate?	Yes	Yes
6. Did the review authors perform data extraction in duplicate?	Yes	Yes
7. Did the review authors provide a list of excluded studies and justify the exclusions?	Yes	Yes
8. Did the review authors describe the included studies in adequate detail?	Yes	Yes
9. Did the review authors use a satisfactory technique for assessing the risk of bias (RoB) in individual studies that were included in the review?	Yes	No
10. Did the review authors report on the sources of funding for the studies included in the review?	Yes	No
11. If meta-analysis was performed did the review authors use appropriate methods for statistical combination of results?	N/A	N/A
12: If meta-analysis was performed did the review authors assess the potential impact of RoB in individual studies on the results of the meta-analysis or other evidence synthesis?	N/A	N/A
13: Did the review authors account for RoB in individual studies when interpreting/ discussing the results of the review?	Yes	No
14: Did the review authors provide a satisfactory explanation for, and discussion of, any heterogeneity observed in the results of the review?	Yes	Yes
15: If they performed quantitative synthesis did the review authors carry out an adequate investigation of publication bias (small study bias) and discuss its likely impact on the results of the review?	Yes	No
16: Did the review authors report any potential sources of conflict of interest, including any funding they received for conducting the review?	Yes	Yes
