# Supplementary material for: CONSORT Compliance of Phacoemulsification Randomised Controlled Trials: A Systematic Review
Source: Research Square preprint supplement (doi:10.21203/rs.3.rs-7190088/v1), 2025-09-03
Supplement: Supplementary file 6 [file af0e1fefc7f2e12776ab672a.xlsx]

## Sheet: Supplementary Digital content 6
Title	Risk of Bias	Inconsistency	Indirectness	Imprecision	Publication Bias	Overall Quality
3D visualization system and standard operating microscope for ease of visualization and surgeon comfort during phacoemulsification surgery	Moderate	No Concerns	No Concerns	No Concerns	Some Concerns	Moderate
The Cutting Efficiency of a Hybrid Phacoemulsification Tip Using High and Low Intraocular Pressure Settings in Different Grades of Cataract	Moderate	No Concerns	No Concerns	No Concerns	No Concerns	Low
A Study to Sompare the Amount of Astigmatism Following Manual Small Incision Cataract Surgery and Phacoemulsification	Moderate	No Concerns	No Concerns	No Concerns	Some Concerns	Moderate
To Evaluate the Difference in Astigmatism on Keratometry Resulting from Temporal and Superior Corneal Incisions During Phacoemulsification	Moderate	No Concerns	No Concerns	Serious Concerns	Some Concerns	Low
Changes in endothelial cell density following conventional phacoemulsification and femtosecond laser-assisted cataract surgery in eyes with dense cataracts	Moderate	No Concerns	No Concerns	Some Concerns	Some Concerns	Moderate
Comparison of Surgically-induced Astigmatism using Topography and Keratometry in Patients undergoing Phacoemulsification and Small Incision Cataract Surgery: a Prospective Interventional Study	Moderate	No Concerns	No Concerns	Some Concerns	Some Concerns	Moderate
Efficacy and safety of the OZil phacoemulsification handpiece in dropped lens fragment surgery: a randomized controlled trial	Moderate	No Concerns	No Concerns	No Concerns	No Concerns	High
Comparison of the reverse chopper-assisted prechop and phaco-chop nucleotomy techniques during phacoemulsification for cataracts with grade III nuclei: a randomized controlled trial	Moderate	No Concerns	No Concerns	Serious Concerns	Some Concerns	Moderate
The safety and efficacy of phacoemulsification surgery in uncomplicated cataracts with and without an ophthalmic-viscosurgical-device	Moderate	No Concerns	No Concerns	Some Concerns	No Concerns	Moderate
Swab Pressing vs Stromal Hydration to Prevent Incision Leakage and Transient Collapse of Anterior Chamber in Phacoemulsification: A Randomized Clinical Trial.	Low	No Concerns	No Concerns	No Concerns	Some Concerns	High
Combined phacoviscocanalostomy versus phacoemulsification alone in patients with coexisting cataract and mild-to-moderate open-angle glaucoma; a randomized-controlled trial.	Moderate	No Concerns	No Concerns	Serious Concerns	No Concerns	Moderate
Safety and prognosis of phacoemulsification using active sentry and active fluidics with different IOP settings - a randomized, controlled study.	Low	No Concerns	No Concerns	Serious Concerns	No Concerns	Moderate
Phacoemulsification using an active fluidics system at physiologic vs high intraocular pressure: impact on anterior and posterior segment physiology.	Low	No Concerns	No Concerns	No Concerns	No Concerns	High
Comparison of pupil expansion devices in small pupil phacoemulsification.	Moderate	No Concerns	No Concerns	Serious Concerns	No Concerns	Moderate
Effect of cervical pillow in phacoemulsification surgery for age-related cataract patients: a prospective randomized controlled study.	Low	No Concerns	No Concerns	No Concerns	Some Concerns	High
Phacoemulsification with gonioscopy-assisted transluminal trabeculotomy versus phacoemulsification alone in primary angle closure glaucoma: A randomized controlled study.	Moderate	No Concerns	No Concerns	Serious Concerns	No Concerns	Moderate
Safety and efficacy of cataract surgery performed with a low-energy femtosecond laser compared with conventional phacoemulsification in Chinese patients: a randomized clinical trial.	Low	No Concerns	No Concerns	Serious Concerns	No Concerns	Moderate
Comparative Evaluation of Phacoemulsification with Goniosynechialysis and Phacoemulsification with Viscogonioplasty in Angle-Closure: A Randomized Clinical Trial	Moderate	No Concerns	No Concerns	Serious Concerns	Some Concerns	Moderate
Efficiency of phacoemulsification handpieces with high and low intraocular pressure settings	Low	No Concerns	No Concerns	No Concerns	No Concerns	High
Comparison between direct chop and stop and chop phacoemulsification techniques in grade 3 and 4 cataract patients	Moderate	No Concerns	No Concerns	No Concerns	Some Concerns	High
Intraoperative Performance and Early Postoperative Outcomes Following Phacoemulsification With Three Fluidic Systems: A Randomized Trial	Moderate	No Concerns	No Concerns	No Concerns	No Concerns	High
Corneal endothelial cell loss and intraocular pressure following phacoemulsification using a new viscous-cohesive ophthalmic viscosurgical device	Moderate	No Concerns	No Concerns	Serious Concerns	No Concerns	Moderate
Early Outcomes of Combined Phacoemulsification and Ab Interno Tanito Microhook Trabeculotomy in Open-Angle Glaucoma	Moderate	No Concerns	No Concerns	No Concerns	No Concerns	High
FLACS vs conventional phacoemulsification by junior cataract surgeons: randomized trial	Moderate	No Concerns	No Concerns	No Concerns	No Concerns	High
Comparison of endothelial cell loss in diabetic patients after conventional phacoemulsification and femtosecond laser-assisted cataract surgery	Moderate	No Concerns	No Concerns	No Concerns	No Concerns	High
