# Supplementary material for: CONSORT Compliance of Phacoemulsification Randomised Controlled Trials: A Systematic Review
Source: Research Square preprint supplement (doi:10.21203/rs.3.rs-7190088/v1), 2025-09-03
Supplement: Supplementary file 7 [file c847602ae48a5073350ea09d.xlsx]

## Sheet: Table 1 
Study Title	Year	Journal	Percentage Compliance
3D visualization system and standard operating microscope for ease of visualization and surgeon comfort during phacoemulsification surgery	2024	Indian Journal of Ophthalmology	64.7
The Cutting Efficiency of a Hybrid Phacoemulsification Tip Using High and Low Intraocular Pressure Settings in Different Grades of Cataract	2024	Clinical Ophthalmology	66.7
A Study to Compare the Amount of Astigmatism Following Manual Small Incision Cataract Surgery and Phacoemulsification	2023	Journal of Academic Medicine and Pharmacy	64.7
To Evaluate the Difference in Astigmatism on Keratometry Resulting from Temporal and Superior Corneal Incisions During Phacoemulsification	2024	Med Forum	40
Changes in endothelial cell density following conventional phacoemulsification and femtosecond laser-assisted cataract surgery in eyes with dense cataracts	2024	J Cataract Refract Surg	51.4
Comparison of Surgically-induced Astigmatism using Topography and Keratometry in Patients undergoing Phacoemulsification and Small Incision Cataract Surgery: a Prospective Interventional Study	2024	Journal of clinical and diagnostic research	62.9
Efficacy and safety of the OZil phacoemulsification handpiece in dropped lens fragment surgery: a randomized controlled trial	2024	Romanion Journal of Opthamology	71.4
Comparison of the reverse chopper-assisted prechop and phaco-chop nucleotomy techniques during phacoemulsification for cataracts with grade III nuclei: a randomized controlled trial	2023	Annals of Translational Medicine	74.3
The safety and efficacy of phacoemulsification surgery in uncomplicated cataracts with and without an ophthalmic-viscosurgical-device	2023	European Journal of Ophthalmology	63.9
Swab Pressing vs Stromal Hydration to Prevent Incision Leakage and Transient Collapse of Anterior Chamber in Phacoemulsification: A Randomized Clinical Trial.	2023	JAMA Ophthalmology	83.8
Combined phacoviscocanalostomy versus phacoemulsification alone in patients with coexisting cataract and mild-to-moderate open-angle glaucoma; a randomized-controlled trial.	2023	Nature - Eye	78.4
Safety and prognosis of phacoemulsification using active sentry and active fluidics with different IOP settings - a randomized, controlled study.	2024	BMC Ophthalmology	78.4
Phacoemulsification using an active fluidics system at physiologic vs high intraocular pressure: impact on anterior and posterior segment physiology.	2024	Journal of Cataract & Refractive Surgery	83.8
Comparison of pupil expansion devices in small pupil phacoemulsification.	2024	Indian Journal of Ophthalmology	47.4
Effect of cervical pillow in phacoemulsification surgery for age-related cataract patients: a prospective randomized controlled study.	2024	International Ophthalmology	57.1
Phacoemulsification with gonioscopy-assisted transluminal trabeculotomy versus phacoemulsification alone in primary angle closure glaucoma: A randomized controlled study.	2024	Acta ophthalmologica	63.9
Safety and efficacy of cataract surgery performed with a low-energy femtosecond laser compared with conventional phacoemulsification in Chinese patients: a randomized clinical trial.	2023	Eye and vision (London, England)	76.3
Comparative Evaluation of Phacoemulsification with Goniosynechialysis and Phacoemulsification with Viscogonioplasty in Angle-Closure: A Randomized Clinical Trial	2024	Siriraj Medical Journal	78.9
Efficiency of phacoemulsification handpieces with high and low intraocular pressure settings	2024	Journal of Cataract and Refractive Surgery	78.4
Comparison between direct chop and stop and chop phacoemulsification techniques in grade 3 and 4 cataract patients	2024	International Journal of Life Sciences Biotechnology and Pharma Research	68.4
Intraoperative Performance and Early Postoperative Outcomes Following Phacoemulsification With Three Fluidic Systems: A Randomized Trial	2024	Journal of Refractive Surgery	83.3
Corneal endothelial cell loss and intraocular pressure following phacoemulsification using a new viscous-cohesive ophthalmic viscosurgical device	2024	International Ophthalmology	67.6
Early Outcomes of Combined Phacoemulsification and Ab Interno Tanito Microhook Trabeculotomy in Open-Angle Glaucoma	2024	Ophthalmology Glaucoma	61.1
FLACS vs conventional phacoemulsification by junior cataract surgeons: randomized trial	2023	Journal of Cataract and Refractive Surgery	83.3
Comparison of endothelial cell loss in diabetic patients after conventional phacoemulsification and femtosecond laser-assisted cataract surgery	2023	BMC ophthalmology	64.9
