# Supplementary material for: CONSORT Compliance of Phacoemulsification Randomised Controlled Trials: A Systematic Review
Source: Research Square preprint supplement (doi:10.21203/rs.3.rs-7190088/v1), 2025-09-03
Supplement: Supplementary file 8 [file f6a701273030d1e7ee3f5a1d.docx]

**Search Strategy**

**PubMed/MEDLINE**

(("adaptive clinical trial" or "clinical trial" or "clinical trial, phase i" or "clinical trial, phase ii" or "clinical trial, phase iii" or "clinical trial, phase iv" or "controlled clinical trial" or "equivalence trial" or "multicenter study" or "pragmatic clinical trial" or "randomized controlled trial").pt. or "adaptive clinical trials as topic"/ or "Clinical Studies as Topic"/ or "clinical trials as topic"/ or "clinical trials, phase i as topic"/ or "clinical trials, phase ii as topic"/ or "clinical trials, phase iii as topic"/ or "clinical trials, phase iv as topic"/ or "controlled clinical trials as topic"/ or "double-blind method"/ or "early termination of clinical trials"/ or "equivalence trials as topic"/ or "intention to treat analysis"/ or "multicenter studies as topic"/ or "non-randomized controlled trials as topic"/ or "pragmatic clinical trials as topic"/ or "randomized controlled trials as topic"/ or (("2" or two or "3" or three or "4" or four) adj arm).ti,ab,kf,kw. or ((clinical or controlled or (cross adj over) or crossover or equivalent or pragmatic or randomisation or randomised or randomization or randomized) adj3 (studies or study or trial or trials)).ti,ab,kf,kw. or (cluster* adj3 (randomised or randomized)).ti,ab,kf,kw. or (stepped adj wedge).ti,ab,kf,kw. or ((window adj opportunity) and trial).ti,ab,kf,kw. or (phase adj1 ("I" or "II" or "III" or "IV" or "1" or "2" or "3" or "4")).ti,ab,kf,kw. or ((one or two or three or four or single or doubl* or tripl*) adj4 (blind or blinded or mask or masked)).ti,ab,kf,kw. or (intervention or interventions).ti.)

AND

exp Ophthalmologic Surgical Procedures/ or "eye surgery".mp. or "ocular surgery".mp. or "refractive surg*".mp. or "cataract surg*".mp. or "retinal surg*".mp. or "glaucoma surg*".mp. or "enucleation". or "ophthalmological surgery".mp. [mp=title, book title, abstract, original title, name of substance word, subject heading word, floating sub-heading word, keyword heading word, organism supplementary concept word, protocol supplementary concept word, rare disease supplementary concept word, unique identifier, synonyms, population supplementary concept word, anatomy supplementary concept word]

**Limited to Papers Published in 2023 and 2024**

**EMBASE**

Same as above for PubMED/MEDLINE

**Cochrane**

(("adaptive clinical trial" OR "clinical trial" OR "clinical trial phase i" OR "clinical trial phase ii" OR "clinical trial phase iii" OR "clinical trial phase iv" OR "controlled clinical trial" OR "equivalence trial" OR "multicenter study" OR "pragmatic clinical trial" OR "randomized controlled trial")

OR "adaptive clinical trials as topic" OR "clinical studies as topic" OR "clinical trials as topic" OR "clinical trials phase i as topic" OR "clinical trials phase ii as topic" OR "clinical trials phase iii as topic" OR "clinical trials phase iv as topic" OR "controlled clinical trials as topic" OR "double-blind method" OR "early termination of clinical trials" OR "equivalence trials as topic" OR "intention to treat analysis" OR "multicenter studies as topic" OR "non-randomized controlled trials as topic" OR "pragmatic clinical trials as topic" OR "randomized controlled trials as topic"

OR (("2" OR "two" OR "3" OR "three" OR "4" OR "four") NEAR/3 arm)

OR ((clinical OR controlled OR (cross NEAR/1 over) OR crossover OR equivalent OR pragmatic OR randomisation OR randomised OR randomization OR randomized) NEAR/3 (studies OR study OR trial OR trials))

OR (cluster* NEAR/3 (randomised OR randomized))

OR (stepped NEAR/1 wedge)

OR ((window NEAR/1 opportunity) AND trial)

OR (phase NEAR/1 ("I" OR "II" OR "III" OR "IV" OR "1" OR "2" OR "3" OR "4"))

OR ((one OR two OR three OR four OR single OR doubl* OR tripl*) NEAR/4 (blind OR blinded OR mask OR masked))

OR (intervention OR interventions))

AND

("ophthalmologic surgical procedures" OR "eye surgery" OR "ocular surgery" OR "refractive surgery" OR "cataract surgery" OR "retinal surgery" OR "glaucoma surgery" OR "enucleation" OR "ophthalmological surgery")

**Limited to Papers Published in 2023 and 2024**

**Web of Science**

TS=( ( "adaptive clinical trial" OR "clinical trial" OR "clinical trial phase i" OR "clinical trial phase ii" OR "clinical trial phase iii" OR "clinical trial phase iv" OR "controlled clinical trial" OR "equivalence trial" OR "multicenter study" OR "pragmatic clinical trial" OR "randomized controlled trial" ) OR "adaptive clinical trials as topic" OR "clinical studies as topic" OR "clinical trials as topic" OR "clinical trials phase i as topic" OR "clinical trials phase ii as topic" OR "clinical trials phase iii as topic" OR "clinical trials phase iv as topic" OR "controlled clinical trials as topic" OR "double-blind method" OR "early termination of clinical trials" OR "equivalence trials as topic" OR "intention to treat analysis" OR "multicenter studies as topic" OR "non-randomized controlled trials as topic" OR "pragmatic clinical trials as topic" OR "randomized controlled trials as topic" OR ( ("2" OR "two" OR "3" OR "three" OR "4" OR "four") NEAR/3 arm ) OR ( (clinical OR controlled OR (cross NEAR/1 over) OR crossover OR equivalent OR pragmatic OR randomisation OR randomised OR randomization OR randomized) NEAR/3 (studies OR study OR trial OR trials) ) OR ( cluster* NEAR/3 (randomised OR randomized) ) OR ( stepped NEAR/1 wedge ) OR ( (window NEAR/1 opportunity) AND trial ) OR ( phase NEAR/1 ("I" OR "II" OR "III" OR "IV" OR "1" OR "2" OR "3" OR "4") ) OR ( (one OR two OR three OR four OR single OR doubl* OR tripl*) NEAR/4 (blind OR blinded OR mask OR masked) ) OR ( intervention OR interventions ) )

AND

TS=("ophthalmologic surgical procedures" OR "eye surgery" OR "ocular surgery" OR "refractive surgery" OR "cataract surgery" OR "retinal surgery" OR "glaucoma surgery" OR "enucleation" OR "ophthalmological surgery")

**Limited to Papers Published in 2023 and 2024**
